# Supplementary material
Source: PubMed Central journal article supplement (PMC4252298)
Supplement: NIHMS627212-supplement.pdf [file NIHMS627212-supplement.pdf]

SUPPLEMENTAL FIGURES

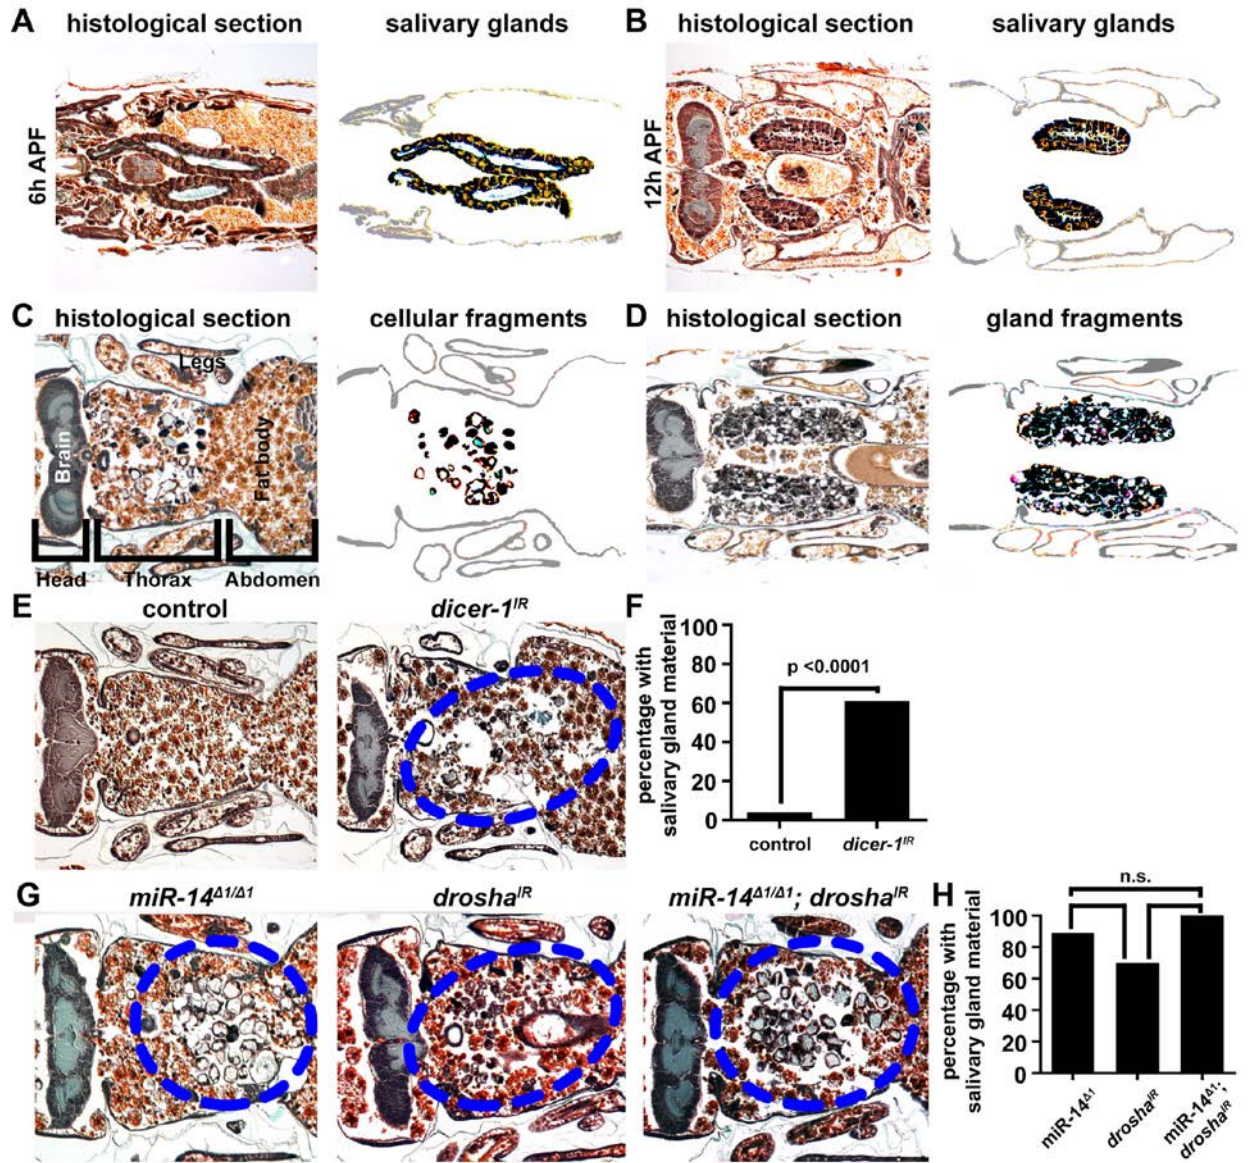

**Figure S1. A description of salivary gland degradation during development, cellular and gland fragments, *dicer-1* is required for salivary gland degradation, and *drosha* functions in the same pathway as *miR-14*. Related to Figure 1**

(A) A histological section (left) of a wild type animal 6 h after puparium formation approximately 8-10 hours before complete gland degradation. The left side of all images is the

anterior end of the animal. The image on the right shows emphasized salivary glands with all other material removed.

(B) A histological section (left) of a wild type animal 12 h after puparium formation approximately 2-4 hours before complete gland degradation. The image on the right shows emphasized salivary glands with all other material removed.

(C) A histological section (left) 24 h after puparium formation of an animal that partially, but not completely, degraded its salivary glands thereby displaying a cellular fragment phenotype (*fkh-GAL4/w; +/UAS-drosha<sup>IR</sup>*). Labeled are the head (left part of the animal), thorax (middle part of the animal), abdomen (right part of the animal), the brain (blue stained tissue), fat body cells (brown and red stained cells), and developing legs. The image on the right shows the cellular fragments with all other material removed. Note these cellular fragments have remained 10 h after they should have been degraded.

(D) A histological section (left) 24 h after puparium formation of an animal failed to degrade its salivary glands thereby displaying a salivary gland fragment phenotype (*w; miR-14<sup>A1</sup>/miR-14<sup>A1</sup>; UAS-p35/fkh-GAL4*). The image on the right shows the gland fragments with all other material removed. Note these gland fragments have remained 10 h after they should have been degraded.

(E) Samples from control animals (*+/w; +/UAS-dicer-1<sup>IR</sup>*),  $n = 27$  (left), and those with salivary gland-specific knockdown of *dicer-1* (*fkh-GAL4/w; +/UAS-dicer-1<sup>IR</sup>*),  $n = 28$  (right), analyzed by histology for the presence of salivary gland material (blue dotted circle) 24 h after puparium formation.

F) Quantification of data from (E). Data are represented as mean. Statistical significance was determined using a Chi-squared test.

(G) Samples from *miR-14* mutant animals ( $w; miR-14^{\Delta 1}/miR-14^{\Delta 1}; +/UAS-drosha^{IR}$ ),  $n =$  (left), animals with salivary gland-specific knockdown of *drosha* ( $w; +/miR-14^{\Delta 1}; fkh-GAL4/UAS-drosha^{IR}$ ),  $n = 23$  (middle), and *miR-14* mutant animals with salivary gland-specific knockdown of *drosha* ( $w; miR-14^{\Delta 1}/miR-14^{\Delta 1}; fkh-GAL4/UAS-drosha^{IR}$ ),  $n = 20$ , analyzed by histology for the presence of salivary gland material (blue dotted circle) 24 h after puparium formation.

(H) Quantification of data from (G). Data are represented as mean. Statistical significance was determined using a Chi-squared test.

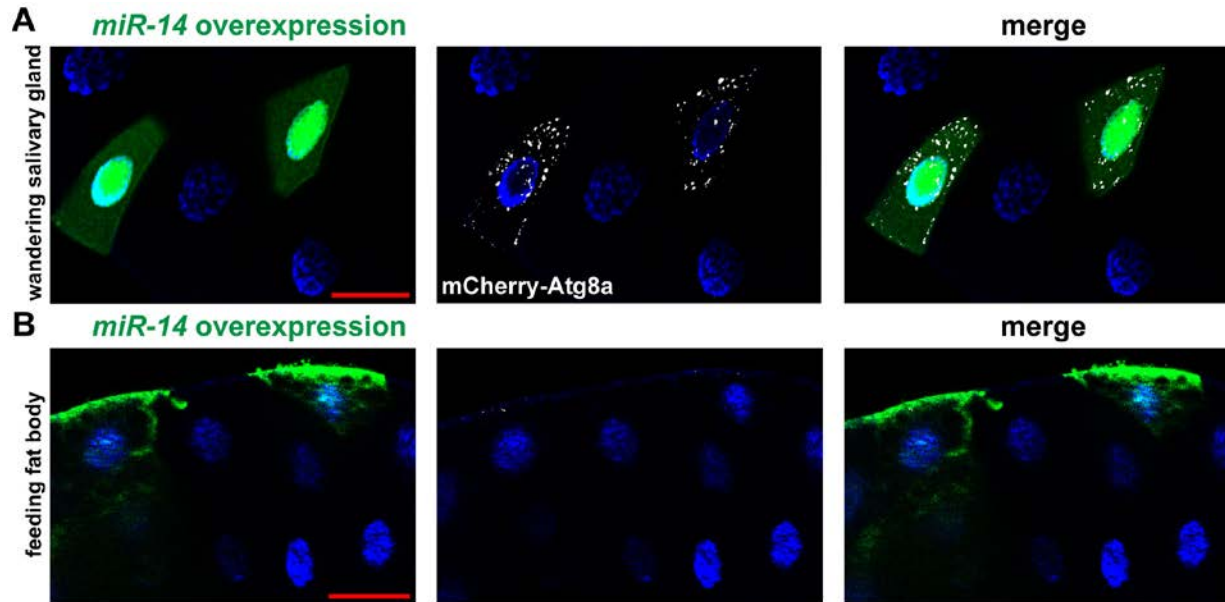

**Figure S2. Mis-expression of *miR-14* is sufficient to induce autophagy in the salivary gland, but not in the fat body. Related to Figure 3**

(A and B) Salivary glands dissected from wandering larvae (A) and fat bodies dissected from feeding larvae (B) expressing mCherry-Atg8a in all cells, and *miR-14* mis-expression specifically in GFP-marked clone cells (*hsflp/w*; *pmCherry-Atg8a/+*; *act<FRT, cd2, FRT>Gal4*, *UAS-GFP/UAS-luciferase-miR-14*) analyzed for mCherry-Atg8a puncta. Salivary glands and fat bodies were all stained with Hoechst (blue). Scale bars represent 50 $\mu$ m.

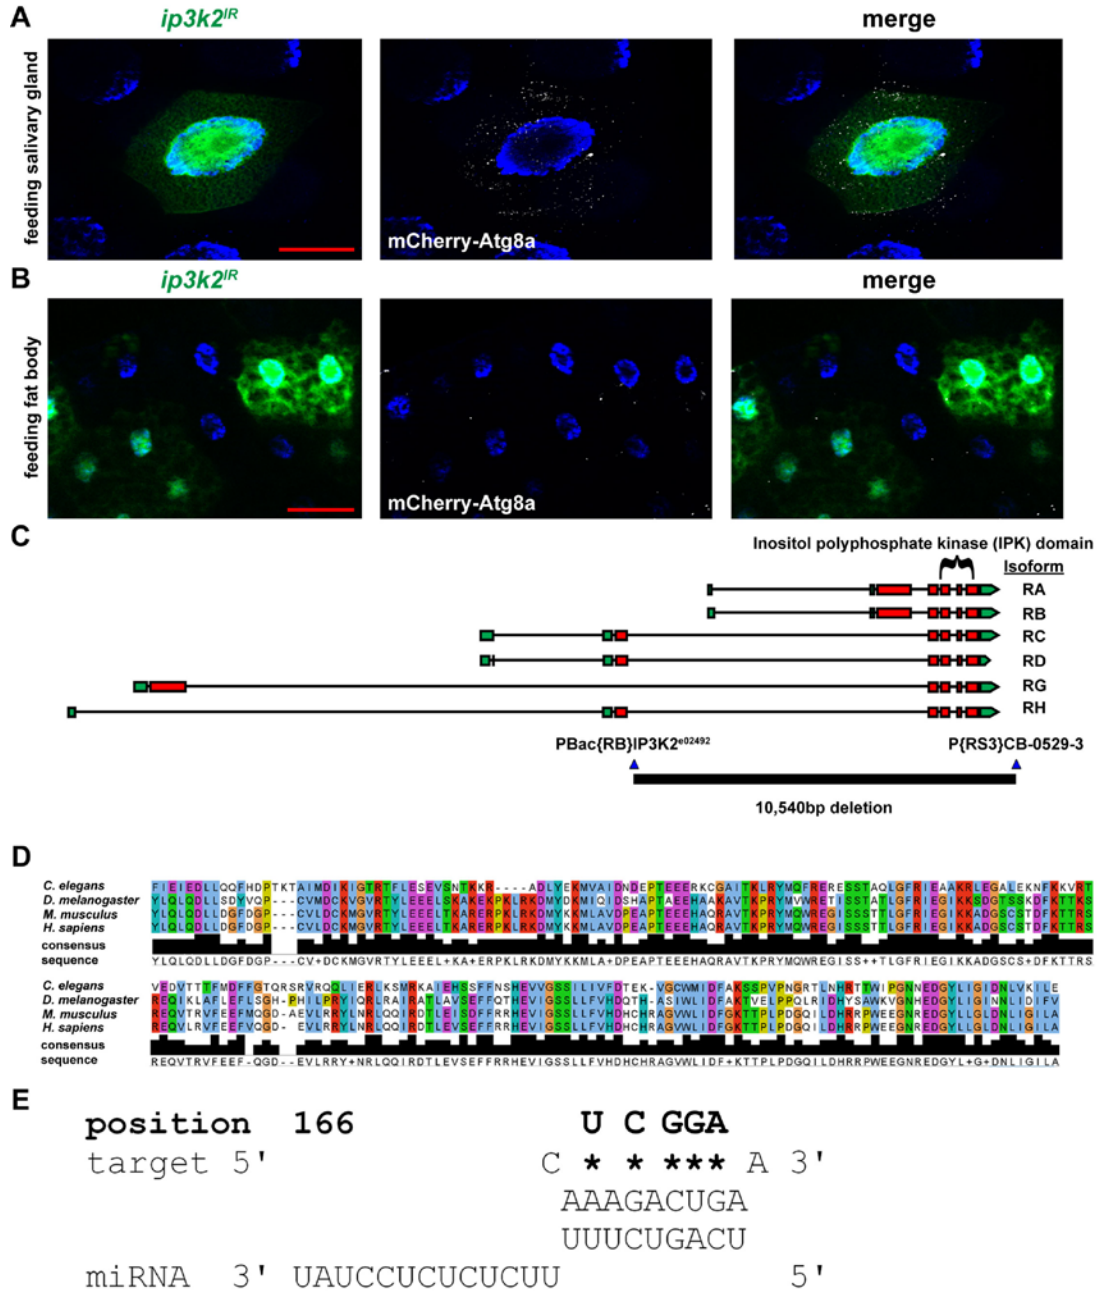

**Figure S3.** *ip3k2* RNAi is sufficient to induce autophagy in the salivary gland, *ip3k2* deletion mutant, the conserved IPK domain of IP3K2, and the predicted *miR-14* binding site in *ip3k2*. Related to Figure 4

(A and B) Salivary glands (A) and fat bodies (B) expressing mCherry-Atg8a in all cells, and *ip3k2<sup>IR</sup>* knockdown specifically in GFP-marked clone cells (*hsflp/w*; *pmCherry-Atg8a/+*;

*act*<FRT, *cd2*, FRT>Gal4, UAS-GFP/UAS-*ip3k2<sup>RR</sup>*) dissected from feeding larvae for analyses of mCherry-Atg8a puncta. Salivary glands and fat bodies were all stained with Hoechst (blue).

Scale bars represent 50µm.

(C) The two flippase recognition target (FRT) containing elements, PBac{RB}IP3K2<sup>e02492</sup> and P{RS3}CB-0529-3 were recombined together to create the *ip3k2<sup>Δ1</sup>* allele containing a 10,540bp genomic deletion that deletes isoforms A and B, and most of isoforms C through H including the IPK domain of all isoforms.

(D) Alignment of the highly conserved IPK domain. The *C. elegans* protein is *lfe-1*. The *D. melanogaster* protein is IP3K2. The *M. musculus* and *H. sapiens* proteins are both ITPKA.

(E) The *miR-14* binding site in the 3' UTR of *ip3k2*. The nucleotides replaced in the mutated sensor line are indicated with \*, and the new nucleotides are shown above.

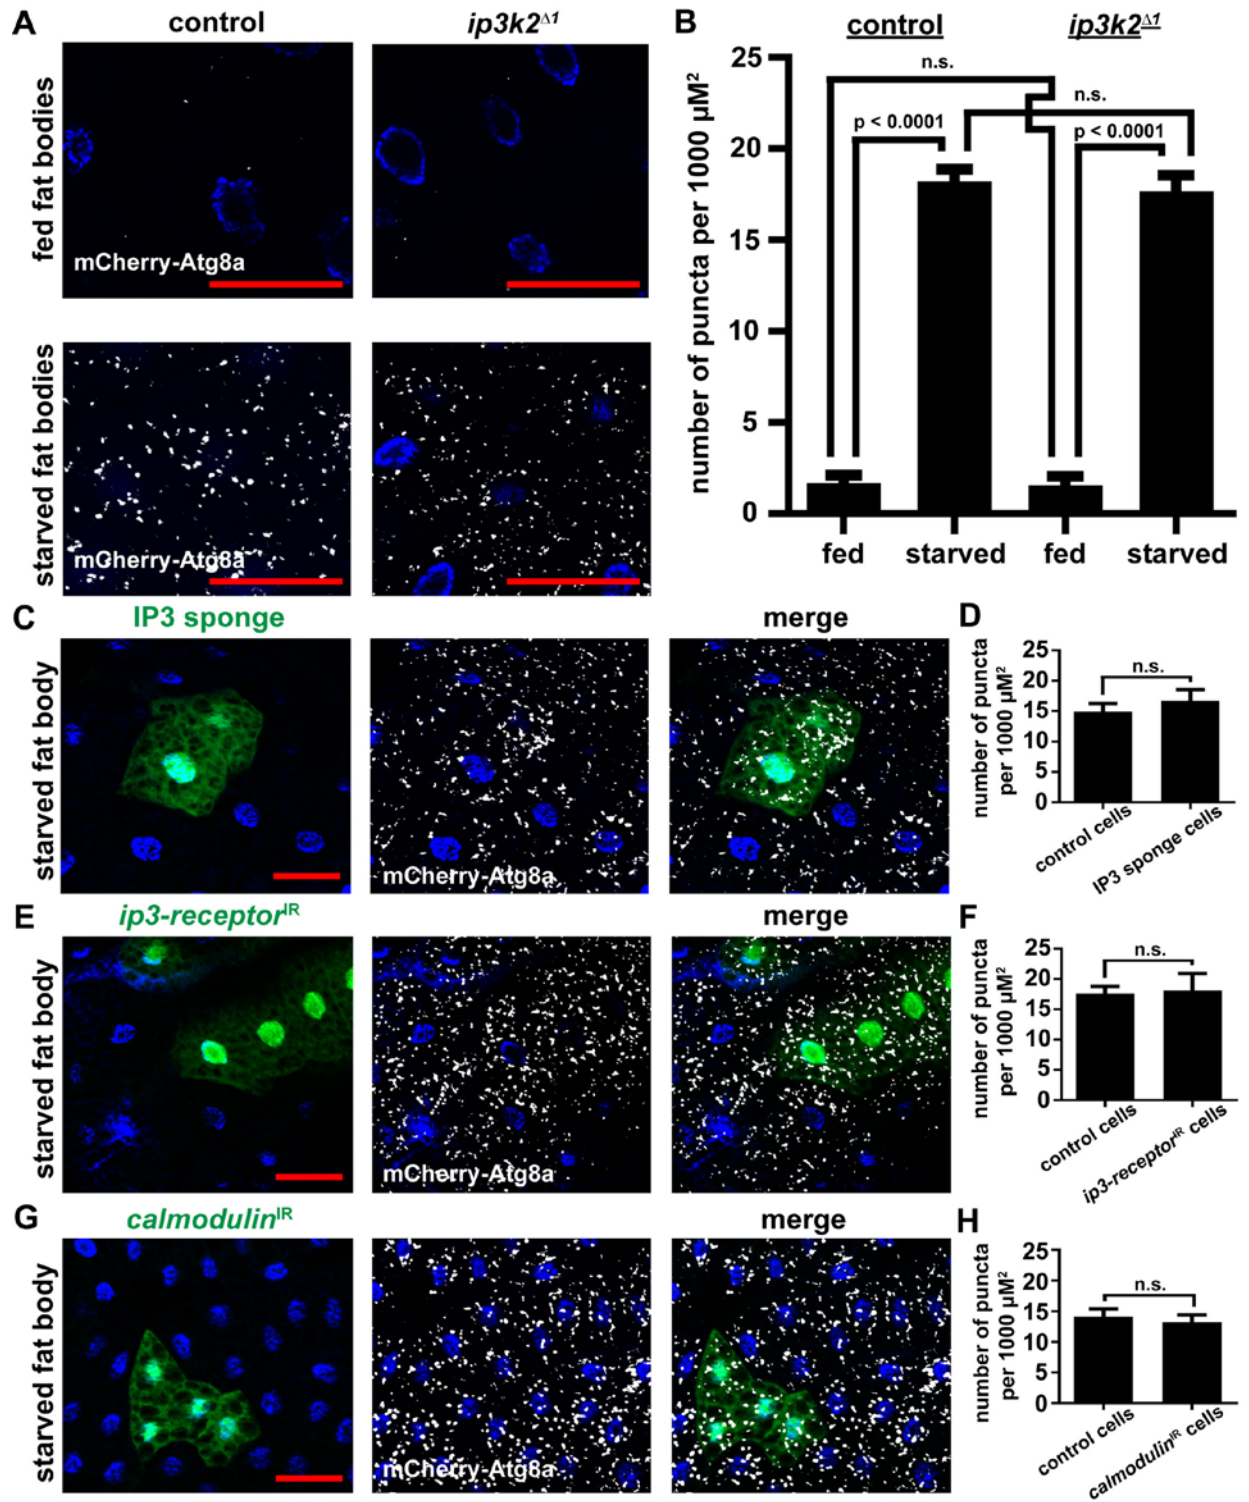

Figure S4. The *ip3k2* mutant, IP3 sponge, *ip3-receptor* and *Calmodulin* knockdowns are not sufficient to alter stress induced autophagy in the fat body. Related to Figure 4

(A) mCherry-Atg8a was expressed in the fat bodies of control animals (left) (*w/ip3k2<sup>ΔI</sup>*; +/-pmCherry-Atg8a) and in *ip3k2<sup>ΔI</sup>* mutant animals (right) (*ip3k2<sup>ΔI</sup>/Y*; +/-pmCherry-Atg8a). Animals were either fed (top) or starved for 4 h (bottom), and fat bodies were dissected for analyses of mCherry-Atg8a puncta.

(B) Quantification of data from (A). Data are represented as mean +/- SEM;  $n \geq 10$ . Statistical significance was determined using a Student's t-test.

(C) Fat bodies expressing mCherry-Atg8a in all cells, and the IP3 sponge specifically in GFP-marked clone cells (*hsflp/w*; pmCherry-Atg8a/+; *act<FRT, cd2, FRT>Gal4, UAS-GFP/UAS-IP3 sponge*) dissected from 4 h starved larvae for analyses of mCherry-Atg8a puncta.

(D) Quantification of data from (C). Data are represented as mean +/- SEM;  $n = 8$ . Statistical significance was determined using a Student's t-test.

(E) Fat bodies expressing mCherry-Atg8a in all cells, and knockdown of the *ip3-receptor* specifically in GFP-marked clone cells (*hsflp/w*; pmCherry-Atg8a/UAS-*ip3-receptor<sup>IR</sup>*; *act<FRT, cd2, FRT>Gal4, UAS-GFP/+*) dissected from 4 h starved larvae for analyses of mCherry-Atg8a puncta.

(F) Quantification of data from (E). Data are represented as mean +/- SEM;  $n = 7$ . Statistical significance was determined using a Student's t-test.

(G) Fat bodies expressing mCherry-Atg8a in all cells, and knockdown of *Calmodulin* specifically in GFP-marked clone cells (*hsflp/w*; pmCherry-Atg8a/+; *act<FRT, cd2, FRT>Gal4, UAS-GFP/UAS-Calmodulin<sup>IR</sup>*) dissected from 4 h starved larvae for analyses of mCherry-Atg8a puncta.

(H) Quantification of data from (G). Data are represented as mean +/- SEM;  $n = 8$ . Statistical significance was determined using a Student's t-test.



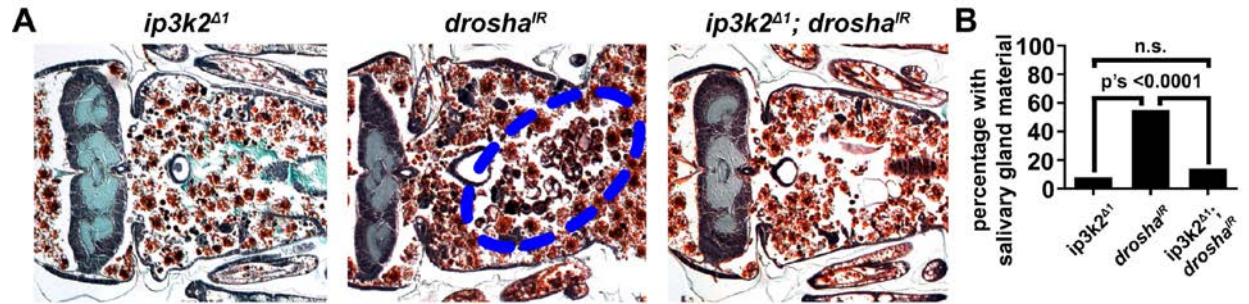

**Figure S5. *ip3k2* functions genetically downstream of *drosha*. Related to Figure 4**

(A) Samples from *ip3k2* mutant animals (*ip3k2<sup>Δ1</sup>/Y*; +/UAS-*drosha<sup>IR</sup>*),  $n = 24$  (left), animals with salivary gland-specific knockdown of *drosha* (*ip3k2<sup>Δ1</sup>/+*; *fkh-GAL4/UAS-drosha<sup>IR</sup>*),  $n = 20$  (middle), and *ip3k2* mutant animals with salivary gland-specific knockdown of *drosha* (*ip3k2<sup>Δ1</sup>/Y*; *fkh-GAL4/UAS-drosha<sup>IR</sup>*),  $n = 21$ , analyzed by histology for the presence of salivary gland material (blue dotted circle) 24 h after puparium formation.

(B) Quantification of data from (A). Data are represented as mean. Statistical significance was determined using a Chi-squared test.

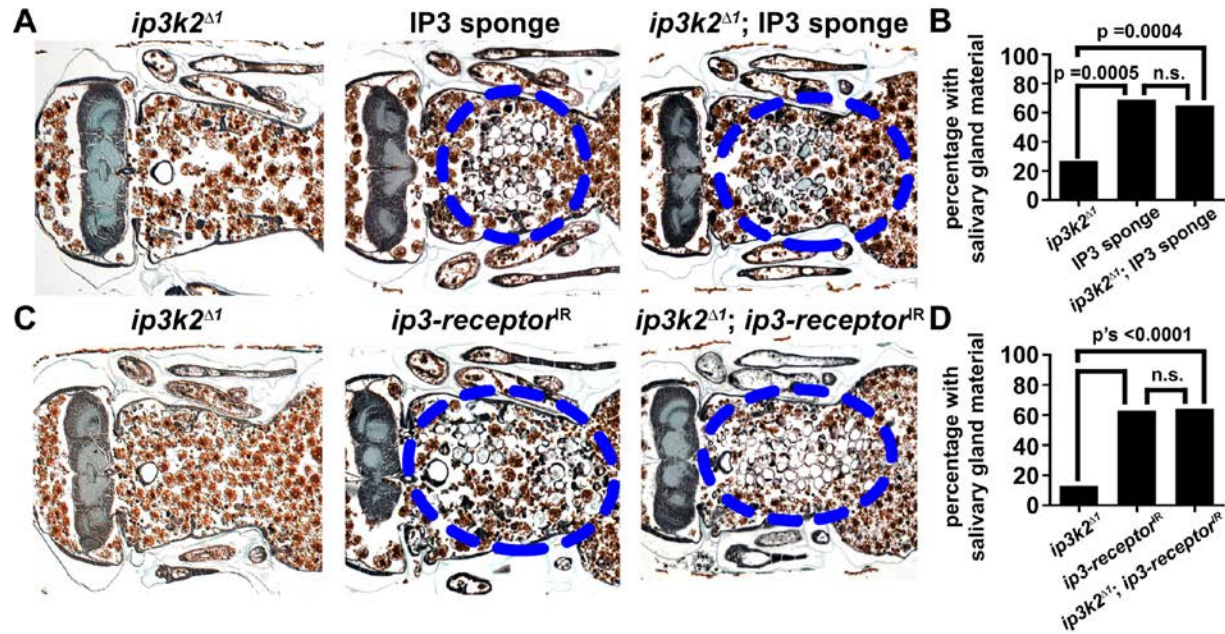

**Figure S6. IP3 signaling is required for salivary gland degradation and function downstream of *ip3k2*. Related to Figure 5**

(A) Samples from *ip3k2* mutant animals (*ip3k2<sup>Δ1</sup>/Y*; +/UAS-IP3 sponge),  $n = 22$  (left), animals with salivary gland-specific expression of the IP3 sponge (*ip3k2<sup>Δ1</sup>/w*; *fkh-GAL4/UAS-IP3* sponge),  $n = 16$  (middle), and *ip3k2* mutant animals with salivary gland-specific expression of the IP3 sponge (*ip3k2<sup>Δ1</sup>/Y*; *fkh-GAL4/UAS-IP3* sponge),  $n = 20$  (right), analyzed by histology for the presence of salivary gland material (blue dotted circles) 24 h after puparium formation.

(B) Quantification of data from (A). Data are represented as mean. Statistical significance was determined using a Chi-squared test.

(C) Samples from *ip3k2* mutant animals (*ip3k2<sup>Δ1</sup>/Y*; +/UAS-*ip3-receptor<sup>IR</sup>*),  $n = 16$  (left), animals with salivary gland-specific knockdown of the *ip3-receptor* (*ip3k2<sup>Δ1</sup>/w*; +/UAS-*ip3-receptor<sup>IR</sup>*; *fkh-GAL4/+*),  $n = 27$  (middle), and *ip3k2* mutant animals with salivary gland-specific knockdown of the *ip3-receptor* (*ip3k2<sup>Δ1</sup>/Y*; +/UAS-*ip3-receptor<sup>IR</sup>*; *fkh-GAL4/+*),  $n = 22$  (right),

analyzed by histology for the presence of salivary gland material (blue dotted circles) 24 h after puparium formation.

(D) Quantification of data from (C). Data are represented as mean. Statistical significance was determined using a Chi-squared test.

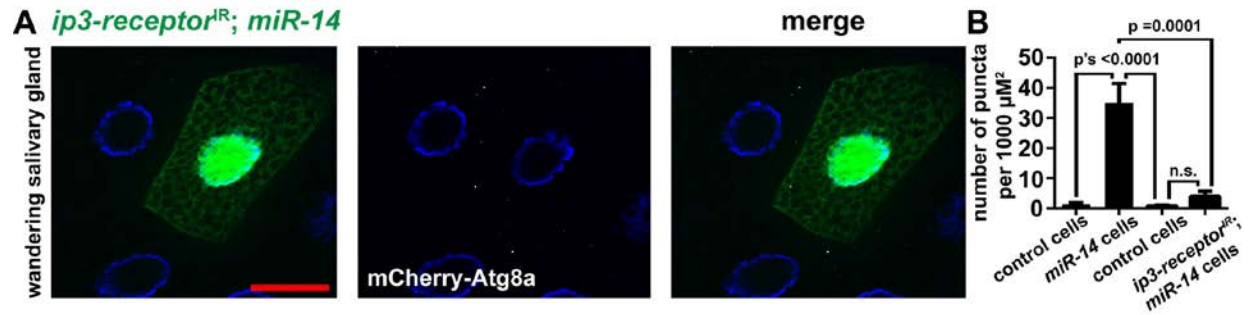

**Figure S7. Knockdown of the *ip3-receptor* in the salivary gland is sufficient to suppress the induction of autophagy by *miR-14* mis-expression. Related to Figures 3 and 5**

(A) A salivary gland expressing mCherry-Atg8a in all cells, and knockdown of the *ip3-receptor* as well as mis-expression of *miR-14* specifically in GFP-marked clone cells (*hsflp/w; pmCherry-Atg8a/UAS-ip3-receptor<sup>IR</sup>; act<FRT, cd2, FRT>Gal4, UAS-GFP/UAS-luc-miR-14*) dissected from wandering larvae for analyses of mCherry-Atg8a puncta.

(B) Quantification of data from Figure S2A (first two columns) and (A) (last two columns). Data are represented as mean  $\pm$  SEM;  $n \geq 9$ . Statistical significance was determined using a Student's t-test.

**Table S1. microRNA levels in the salivary gland during cell death. Related to Figure 1**

| microRNA              | Hours after puparium formation |             |            |            |            |
|-----------------------|--------------------------------|-------------|------------|------------|------------|
|                       | 6                              | 8           | 10         | 12         | 14         |
| <i>dme-miR-1</i>      | 11.16457833                    | 8.96409467  | 10.38516   | 9.78672    | 10.77394   |
| <i>dme-miR-2a</i>     | 12.281498                      | 9.62075467  | 10.72464   | 10.39966   | 10.7852    |
| <i>dme-miR-2b</i>     | 10.79751833                    | 8.04892467  | 11.06917   | 8.64838    | 9.76797    |
| <i>dme-miR-2c</i>     | undetected                     | undetected  | undetected | undetected | undetected |
| <i>dme-miR-3</i>      | undetected                     | undetected  | undetected | undetected | undetected |
| <i>dme-miR-4</i>      | undetected                     | undetected  | undetected | undetected | undetected |
| <i>dme-miR-5</i>      | undetected                     | undetected  | undetected | undetected | undetected |
| <i>dme-miR-6</i>      | undetected                     | undetected  | undetected | undetected | undetected |
| <i>dme-miR-7</i>      | undetected                     | 11.64106467 | undetected | undetected | undetected |
| <i>dme-miR-8</i>      | 9.537857667                    | 6.12127467  | 8.64859    | 6.84268    | 9.1936     |
| <i>dme-miR-9a</i>     | 12.27861967                    | 8.38115467  | 12.22185   | undetected | undetected |
| <i>dme-miR-9b</i>     | 13.152634                      | 10.16113467 | 12.85452   | undetected | undetected |
| <i>dme-miR-9c</i>     | undetected                     | 11.38323467 | 13.02512   | 11.34856   | undetected |
| <i>dme-miR-10</i>     | undetected                     | undetected  | undetected | undetected | undetected |
| <i>dme-miR-11</i>     | 10.10956867                    | 8.45094467  | 10.18735   | 8.30703    | 9.40849    |
| <i>dme-miR-12</i>     | 9.986912667                    | 9.00629467  | 9.59349    | 8.07788    | 11.06808   |
| <i>dme-miR-13a</i>    | undetected                     | undetected  | undetected | undetected | undetected |
| <i>dme-miR-13b</i>    | 11.911716                      | 9.18659467  | 10.4429    | 8.67231    | 9.99911    |
| <i>dme-miR-14</i>     | 10.64355733                    | 7.42450467  | 8.86879    | 7.52733    | 9.41584    |
| <i>dme-miR-31a</i>    | undetected                     | 12.43609467 | undetected | undetected | undetected |
| <i>dme-miR-31b</i>    | undetected                     | undetected  | undetected | undetected | undetected |
| <i>dme-miR-33</i>     | undetected                     | undetected  | undetected | undetected | undetected |
| <i>dme-miR-34</i>     | undetected                     | 13.00962467 | 12.82689   | 11.4035    | undetected |
| <i>dme-miR-79</i>     | undetected                     | undetected  | undetected | 11.38347   | undetected |
| <i>dme-miR-87</i>     | undetected                     | undetected  | undetected | undetected | undetected |
| <i>dme-miR-92a</i>    | undetected                     | 11.98784467 | undetected | undetected | undetected |
| <i>dme-miR-92b</i>    | undetected                     | 11.63027467 | undetected | undetected | undetected |
| <i>dme-miR-100</i>    | undetected                     | 11.58414467 | undetected | undetected | undetected |
| <i>dme-miR-124</i>    | undetected                     | undetected  | undetected | undetected | undetected |
| <i>dme-miR-125</i>    | undetected                     | 10.79810467 | 12.3666    | 10.27391   | undetected |
| <i>dme-miR-133</i>    | undetected                     | undetected  | undetected | undetected | undetected |
| <i>dme-miR-184</i>    | undetected                     | 9.13495467  | 13.10597   | 9.55139    | 8.75563    |
| <i>dme-miR-184*</i>   | undetected                     | undetected  | undetected | undetected | undetected |
| <i>dme-miR-210</i>    | undetected                     | undetected  | undetected | undetected | undetected |
| <i>dme-miR-219</i>    | undetected                     | undetected  | undetected | undetected | undetected |
| <i>dme-miR-263a</i>   | undetected                     | undetected  | 12.9377    | undetected | undetected |
| <i>dme-miR-263b</i>   | undetected                     | undetected  | undetected | undetected | undetected |
| <i>dme-miR-274</i>    | undetected                     | undetected  | undetected | undetected | undetected |
| <i>dme-miR-275</i>    | 8.629958333                    | 7.22112467  | 7.87684    | 8.04112    | 8.12283    |
| <i>dme-miR-276a</i>   | 8.528196                       | 6.18353467  | 8.17634    | 7.03379    | 6.34527    |
| <i>dme-miR-276a*</i>  | undetected                     | undetected  | undetected | undetected | undetected |
| <i>dme-miR-276b</i>   | 11.51158333                    | 8.17866467  | 10.09851   | 9.83226    | 7.60686    |
| <i>dme-miR-277</i>    | 13.19924933                    | 10.40040467 | undetected | 10.03176   | undetected |
| <i>dme-miR-278</i>    | undetected                     | undetected  | undetected | undetected | undetected |
| <i>dme-miR-279</i>    | undetected                     | 11.95146467 | 12.96985   | 11.31981   | undetected |
| <i>dme-miR-280</i>    | undetected                     | undetected  | 12.88042   | undetected | undetected |
| <i>dme-miR-281</i>    | undetected                     | undetected  | undetected | undetected | undetected |
| <i>dme-miR-281-1*</i> | undetected                     | undetected  | undetected | undetected | undetected |
| <i>dme-miR-282</i>    | undetected                     | undetected  | undetected | undetected | undetected |
| <i>dme-miR-283</i>    | undetected                     | undetected  | undetected | undetected | undetected |
| <i>dme-miR-284</i>    | undetected                     | undetected  | undetected | undetected | undetected |
| <i>dme-miR-285</i>    | undetected                     | undetected  | undetected | undetected | undetected |
| <i>dme-miR-286</i>    | undetected                     | undetected  | undetected | undetected | undetected |
| <i>dme-miR-287</i>    | undetected                     | undetected  | undetected | undetected | undetected |
| <i>dme-miR-288</i>    | undetected                     | undetected  | undetected | undetected | undetected |
| <i>dme-miR-289</i>    | 11.747825                      | 8.57399467  | 8.35656    | 8.25614    | 9.88747    |

|                         |             |             |            |            |            |
|-------------------------|-------------|-------------|------------|------------|------------|
| <i>dme-miR-303</i>      | undetected  | undetected  | undetected | undetected | undetected |
| <i>dme-miR-304</i>      | 10.48159333 | 9.34134467  | 9.65785    | 7.96495    | undetected |
| <i>dme-miR-305</i>      | undetected  | 9.96978467  | 10.83799   | 9.61609    | undetected |
| <i>dme-miR-306</i>      | undetected  | undetected  | undetected | undetected | undetected |
| <i>dme-miR-306*</i>     | undetected  | undetected  | undetected | undetected | undetected |
| <i>dme-miR-307</i>      | 9.221936    | 7.69138467  | 7.95909    | 6.89493    | 6.42864    |
| <i>dme-miR-308</i>      | undetected  | undetected  | undetected | undetected | undetected |
| <i>dme-miR-309</i>      | undetected  | undetected  | undetected | undetected | undetected |
| <i>dme-miR-310</i>      | undetected  | undetected  | undetected | undetected | undetected |
| <i>dme-miR-311</i>      | undetected  | undetected  | undetected | undetected | undetected |
| <i>dme-miR-312</i>      | undetected  | undetected  | undetected | undetected | undetected |
| <i>dme-miR-313</i>      | undetected  | undetected  | undetected | undetected | undetected |
| <i>dme-miR-314</i>      | undetected  | undetected  | undetected | undetected | undetected |
| <i>dme-miR-315</i>      | undetected  | undetected  | undetected | undetected | undetected |
| <i>dme-miR-316</i>      | undetected  | undetected  | undetected | undetected | undetected |
| <i>dme-miR-317</i>      | undetected  | undetected  | undetected | undetected | undetected |
| <i>dme-miR-318</i>      | undetected  | undetected  | undetected | undetected | undetected |
| <i>dme-miR-iab-4-3p</i> | undetected  | undetected  | undetected | undetected | undetected |
| <i>dme-miR-iab-4-5p</i> | undetected  | undetected  | undetected | undetected | undetected |
| <i>dme-miR-bantam</i>   | 11.69185933 | 10.48656467 | 11.156     | 10.83246   | undetected |
| <i>dme-miR-let7</i>     | 13.33426933 | 11.49732467 | undetected | undetected | undetected |

---

Total RNA was extracted from dissected wild type (Canton S) salivary glands staged at 6, 8, 10, 12 and 14 h after puparium formation. TaqMan was used to profile 77 microRNAs for presence in the salivary gland.  $\Delta$ CT was normalized to 2s RNA and is listed for each microRNA that was profiled at each time point.

**Table S2. List of RNAi lines screened to identify targets of *miR-14*. Related to Figure 4**

| Gene                                                        | RNAi line                                 |
|-------------------------------------------------------------|-------------------------------------------|
| <i>Activity-regulated cytoskeleton associated protein 1</i> | Bloomington TRiP 25954                    |
| <i>Aspartyl-tRNA synthetase</i>                             | VDR TID 7750                              |
| <i>bip1</i>                                                 | VDR TID 26104                             |
| <i>calcium-binding protein 1</i>                            | VDR TID 108439                            |
| <i>Cdk12</i>                                                | VDR TID 25508                             |
| <i>center divider</i>                                       | VDR TID 43634                             |
| <i>cg11367</i>                                              | VDR TID 26141                             |
| <i>CG6793</i>                                               | VDR TID 101148                            |
| <i>CG6954</i>                                               | VDR TID 27759                             |
| <i>CG8258</i>                                               | VDR TID 45790                             |
| <i>Ecdysone-induced protein 75B</i>                         | VDR TID 108399                            |
| <i>Ecdysone receptor</i>                                    | VDR TID 37059                             |
| <i>GalNAc-T1</i>                                            | VDR TID 37174                             |
| <i>hairly</i>                                               | Bloomington TRiP 34326                    |
| <i>Hormone-receptor-like in 78</i>                          | VDR TID 109435                            |
| <i>I'm not dead yet</i>                                     | VDR TID 9981                              |
| <i>Innexin 3</i>                                            | VDR TID 39094                             |
| <i>Inositol 1,4,5-trisphosphate kinase 1</i>                | Bloomington TRiP 31733 and Terhzaz et al. |
| <i>Inositol 1,4,5-trisphosphate kinase 2</i>                | VDR TIDs 19159 and 102772                 |
| <i>inscuteable</i>                                          | Bloomington TRiP 35042                    |
| <i>Ionotropic receptor 76a</i>                              | Bloomington TRiP 34678                    |
| <i>Lsm11</i>                                                | VDR TID 20280                             |
| <i>Mesoderm-expressed 2</i>                                 | Bloomington TRiP 32460                    |
| <i>mushroom-body expressed</i>                              | VDR TID 28024                             |
| <i>rhomboid</i>                                             | Bloomington TRiP 28609                    |
| <i>roughest</i>                                             | Bloomington TRiP 28672                    |
| <i>small optic lobes</i>                                    | Bloomington TRiP 29463                    |
| <i>sugarbabe</i>                                            | Bloomington TRiP 55182                    |
| <i>Sulfated</i>                                             | VDR TID 37361                             |
| <i>vrille</i>                                               | VDR TID 5650                              |
| <i>X11L</i>                                                 | VDR TID 27429                             |

RNAi lines screened for clonal induction of pmCherry-Atg8a puncta in dissected wandering larval salivary glands, but not in feeding larval fat bodies. RNAi lines were crossed with *hsflp*; pmCherry-Atg8a; *act*<FRT, *cd2*, FRT>Gal4, UAS-GFP.

## SUPPLEMENTAL EXPERIMENTAL PROCEDURES

### *Drosophila* strains

The Canton-S strain was used as the wild-type control. *miR-14<sup>Δ1</sup>* (Xu et al., 2003), *miR-9a<sup>e39</sup>* and *miR-9a<sup>j22</sup>* (Li et al., 2006), *miR-8<sup>Δ2</sup>* (Karres et al., 2007), *miR-7<sup>Δ1</sup>* (Li and Carthew, 2005), *let-7<sup>KO.C</sup>* (Caygill and Johnston, 2008), *let-7<sup>KO1</sup>* and *let-7<sup>GKI</sup>* (Sokol et al., 2008), *miR-278<sup>KO</sup>* (Teleman et al., 2006), *miR-279<sup>S0962-7</sup>* and *miR-279<sup>A0.8</sup>* (Cayirlioglu et al., 2008), *pWiz-drosHa<sup>IR#2</sup>* (from P. Zamore) and *UAS-dicer-1<sup>IR</sup>* (Bloomington *Drosophila* stock center line 28598) were used for analyses of microRNA function. The following Vienna *Drosophila* RNAi Center (VDRC) stocks were used: *UAS-Atg6<sup>IR</sup>* VDRC Transformant ID (TID) 22122, *UAS-ip3k2<sup>IR</sup>* VDRC TID 102772, *UAS-ip3k2<sup>IR</sup>* VDRC TID 19159. The sequences used for VDRC knock-down strains are available for each TID at <http://stockcenter.vdrc.at/control/main>. For mis-expression studies, we used *UAS-miR-14* (Xu et al., 2003), *UAS-luciferase-miR-14* (Bloomington *Drosophila* stock center line 41178) and *UAS-p35* (Hay et al., 1994). For clonal mis-expression and RNAi studies we used *hsflp; +; act<FRT, cd2, FRT>Gal4, UAS-GFP* (Bloomington *Drosophila* stock center). All RNAi lines used to screen for targets of *miR-14* are listed in Supplementary Table 2. *pmCherry-Atg8a* was used as a marker of autophagy (Denton et al., 2012), and *tGPH* was used as a reporter of phosphatidylinositol-3, 4, 5-P3 (Britton et al., 2002). *tub-eGFP-ip3k2* wild type 3'UTR and *tub-eGFP-ip3k2* mutated 3'UTR lines were used as sensors for regulation of the *ip3k2* 3'UTR by *miR-14*. The *ip3k2* mutant allele *ip3k2<sup>Δ1</sup>* was created for this paper. *UAS-IP3-sponge<sup>M49</sup>* (Usui-Aoki et al., 2005), *UAS-ip3-receptor<sup>IR</sup>* (VDRC TID 106982), and *UAS-calmodulin<sup>IR</sup>* (Bloomington *Drosophila* stock center line 34609) were used for analysis of IP3 signaling and *Calmodulin*. *UAS-GCaMP5* strains were used for live-imaging of calcium (Bloomington *Drosophila* stock center lines 42037 and 42038).



### ***ip3k2<sup>Δ1</sup>* mutant**

The *ip3k2<sup>Δ1</sup>* deletion allele was created by flippase mediated site specific recombination of the lines PBac{RB}IP3K2<sup>e02492</sup> (Bloomington *Drosophila* stock center 18060) and P{RS3}CB-0529-3 (*Drosophila* Genetic Resource Center line number 123222), resulting in a 10,540 base pair deletion from genomic locations X:13,213,313 to 13,223,853 while leaving a 2,241 base pair hybrid PBac{RB}/P{RS3} element, and was subsequently out crossed three times to wild-type strain. The deletion was validated by two rounds of PCR amplification using the primers 5'-CCGCCGAAGATTGCGTTGATTACACT-3' and 5'-GTCCCCTTGAAATCTCGCTGTGACTG-3' for the first round and the primers 5'-GTATCCATCCTCGTCGC-3' and 5'-CTTTCGCACAAACAAACCTT-3' for the second round, and the final product was TOPO cloned. The TOP clone was then sequenced using the primers 5'-CTTTCTAGAGAATAGGAACTTC-3', 5'-GAAGTTCCTATTCTCTAGAAAG-3', and the TOPO cloning primers m13 forward and m13 reverse to validate the deletion.

### **Transgenic strains**

To generate the *tub-eGFP-ip3k2* wild type 3'UTR vector, the 3'UTR of *ip3k2* was amplified from genomic DNA using the primers 5'-GATATTCTAGAATCCATACATTTCCACACGGAGG-3' and 5'-GATATCTCGAGCACTGGTCGTCATTTTGCCG-3' and ligated into the XbaI-XhoI the cut *tub-eGFP* vector (from E. Lai). The attB sequence was amplified from the pUAST-attB vector (GenBank: EF362407 1) by using the primers 5'-GATATCTCGAGGATCCACTAGTGTCGACGATGT-3' and 5'-

GATATCTCGAGTGGCTAGAACTAGTGTCGACAT-3' and ligated into the EcoRI cut *tub-eGFP-ip3k2* 3'UTR vector. The *miR-14* binding site was mutated via *de novo* gene synthesis (Biomatik). The sequence

TCTAGAATCCATACATTTCCACACGGAGGTTTGGGGCTGGGCCCCGGAGA  
CAAAGACATTTCCAATTTCCGAATCGATTAATCCCCAATTCCTAGGCTTA  
GTTATACATTTTTTTTTTTGTTTTTTTCTAACAGTTTGCGTACATTTAACC  
CCTTAAGTTTAAAATCATACAGGAAAATCACAATATGCATACACATATTTTTTAATA  
TATACGATATACGCGT was ligated into the XbaI and MluI cut wild type sensor vector.

Construct sequences were validated and inserted into the attP2 landing site to generate transgenic *Drosophila* lines (Genetic Services, Inc).

## SUPPLEMENTAL REFERENCES

Britton, J.S., Lockwood, W.K., Li, L., Cohen, S.M., and Edgar, B.A. (2002). *Drosophila's* insulin/PI3-kinase pathway coordinates cellular metabolism with nutritional conditions. *Dev Cell* 2, 239-249.

Caygill, E.E., and Johnston, L.A. (2008). Temporal regulation of metamorphic processes in *Drosophila* by the *let-7* and *miR-125* heterochronic microRNAs. *Curr Biol* 18, 943-950.

Cayirlioglu, P., Kadow, I.G., Zhan, X., Okamura, K., Suh, G.S., Gunning, D., Lai, E.C., and Zipursky, S.L. (2008). Hybrid neurons in a microRNA mutant are putative evolutionary intermediates in insect CO2 sensory systems. *Science* 319, 1256-1260.

Denton, D., Chang, T.K., Nicolson, S., Shrivage, B., Simin, R., Baehrecke, E.H., and Kumar, S. (2012). Relationship between growth arrest and autophagy in midgut programmed cell death in *Drosophila*. *Cell Death Differ* 19, 1299-1307.

Hay, B.A., Wolff, T., and Rubin, G.M. (1994). Expression of baculovirus P35 prevents cell death in *Drosophila*. *Development* 120, 2121-2129.

Karres, J.S., Hilgers, V., Carrera, I., Treisman, J., and Cohen, S.M. (2007). The conserved microRNA *miR-8* tunes atrophin levels to prevent neurodegeneration in *Drosophila*. *Cell* 131, 136-145.

Li, X., and Carthew, R.W. (2005). A microRNA mediates EGF receptor signaling and promotes photoreceptor differentiation in the *Drosophila* eye. *Cell* *123*, 1267-1277.

Li, Y., Wang, F., Lee, J.A., and Gao, F.B. (2006). MicroRNA-9a ensures the precise specification of sensory organ precursors in *Drosophila*. *Genes Dev* *20*, 2793-2805.

Sokol, N.S., Xu, P., Jan, Y.N., and Ambros, V. (2008). *Drosophila* let-7 microRNA is required for remodeling of the neuromusculature during metamorphosis. *Genes Dev* *22*, 1591-1596.

Teleman, A.A., Maitra, S., and Cohen, S.M. (2006). *Drosophila* lacking microRNA miR-278 are defective in energy homeostasis. *Genes Dev* *20*, 417-422.

Usui-Aoki, K., Matsumoto, K., Koganezawa, M., Kohatsu, S., Isono, K., Matsubayashi, H., Yamamoto, M.T., Ueda, R., Takahashi, K., Saigo, K., *et al.* (2005). Targeted expression of Ip3 sponge and Ip3 dsRNA impairs sugar taste sensation in *Drosophila*. *J Neurogenet* *19*, 123-141.

Xu, P., Vernooy, S.Y., Guo, M., and Hay, B.A. (2003). The *Drosophila* microRNA mir-14 suppresses cell death and is required for normal fat metabolism. *Curr Biol* *13*, 790-795.
